# Supplementary figures and images for: Coping with cold: The genome of the versatile marine Antarctica bacterium Pseudoalteromonas haloplanktis TAC125
Source: HighWire-hosted journal article supplement (doi:10.1101/gr.4126905), 2005-09-16

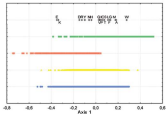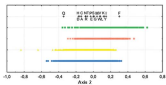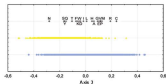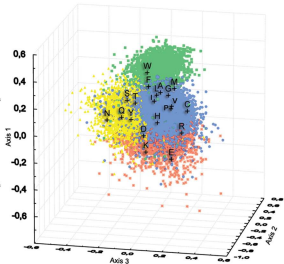

Supplement: figure_4.pdf [file figure_4.pdf]
